# Supplementary material for: A comprehensive organic nitrate chemistry: insights into the lifetimeof atmospheric organic nitrates
Source: Copernicus journal article supplement (doi:10.5194/acp-2018-530), 2018-06-13
Supplement: Supplementary file 1 [file acp-2018-530-supplement.pdf]

| Reactants | Products                                                                                                                                                           | Rate                 | References                                 | Status   |
|-----------|--------------------------------------------------------------------------------------------------------------------------------------------------------------------|----------------------|--------------------------------------------|----------|
| ISOP+HO2  | 0.628 ISHPA+0.272<br>ISHPB+0.037<br>ISHPD+0.063 HO+0.063<br>HO2+0.063 HCHO+0.025<br>MACR+0.038 MVK                                                                 | 2.06D-13 exp(1300/T) | (Liu et al., 2013; St. Clair et al., 2015) | Modified |
| ISHPA+HO  | 0.75 ISOP+0.25 HC5<br>+0.125 HO+0.125 H2O                                                                                                                          | 6.13D-12exp(200/T)   | (St. Clair et al., 2015)                   | Added    |
| ISHPB+HO  | 0.480 ISOP+0.520<br>HC5+0.26 HO+0.26 H2O                                                                                                                           | 4.14D-12exp(200/T)   | (St. Clair et al., 2015)                   | Modified |
| ISHPD+HO  | 0.250 ISOP+0.750<br>HC5+0.375 HO+0.375<br>H2O                                                                                                                      | 5.11D-12exp(200/T)   | (St. Clair et al., 2015)                   | Added    |
| ISHPA+HO  | 0.578 IEPOXA+0.272<br>IEPOXB+0.850 HO+0.150<br>HC5P                                                                                                                | 1.7D-11exp(390/T)    | (St. Clair et al., 2015)                   | Added    |
| ISHPB+HO  | 0.68 IEPOXA+0.32<br>IEPOXB+1.00 HO                                                                                                                                 | 2.97D-11exp(390/T)   | (St. Clair et al., 2015)                   | Modified |
| ISHPD+HO  | 0.50 IEPOXD+0.50<br>HC5P+0.50 HO                                                                                                                                   | 2.92D-11exp(390/T)   | (St. Clair et al., 2015)                   | Added    |
| IEPOXA+HO | IEPOXOO                                                                                                                                                            | 3.73D-11exp(-400/T)  | (Bates et al., 2016)                       | Added    |
| IEPOXB+HO | IEPOXOO                                                                                                                                                            | 5.79D-11exp(-400/T)  | (Bates et al., 2016)                       | Modified |
| IEPOXD+HO | IEPOXOO                                                                                                                                                            | 3.20D-11exp(-400/T)  | (Bates et al., 2016)                       | Added    |
| ISOP+NO   | 0.4 MVK+0.26<br>MACR+0.883<br>NO2+0.0117<br>ISOPND+0.1053<br>ISOPNB+0 .66<br>HCHO+0.143 UHC+0.08<br>DIBOO+0.803 HO2                                                | 2.7D-12exp(360/T)    | (Peeters et al., 2014; Teng et al., 2017)  | Modified |
| ISOPNB+O3 | 0.541 HCHO+0.506<br>CO+0.526 HO+0.327<br>NO2+0.179 HAC+0.102<br>H2O2+0.349<br>MACRN+0.112<br>IMONIT+0.128<br>CO2+0.327 HO2+0.068<br>ORA1+0.212<br>MVKN+0.14 8 MGLY | 3.7D-19              | (Lee et al., 2014)                         | Modified |
| ISOPND+O3 | 0.266 PROPNN+0.017<br>ORA2+0.249<br>GLYC+0.075 H2O2+0.89                                                                                                           | 2.9D-17              | (Lee et al., 2014)                         | Modified |

|             |                                                                                                                                 |                     |                                            |          |
|-------------|---------------------------------------------------------------------------------------------------------------------------------|---------------------|--------------------------------------------|----------|
|             | HO+0.445 HO2+0.214<br>CO+0.214 HCHO+0.445<br>NO2+0.271<br>ETHLN+0.018<br>IMONIT+0.445 MGLY+0<br>.289 HAC+0.231 GLY              |                     |                                            |          |
| ISOPNB+HO   | 0.88 ISOPNBO2+0.12<br>IEPOXA+0.12 NO2                                                                                           | 2.4D-12exp(745/T)   | (Jacobs et al., 2014;<br>Lee et al., 2014) | Modified |
| ISOPND+HO   | ISOPNDO2                                                                                                                        | 1.2D-11exp(652/T)   | (Lee et al., 2014)                         | Modified |
| ISOPNDO2+NO | 0.15 PROPNN+0.44<br>HAC+0.07 MVKN+0.13<br>ETHLN+0.31 ORA1+0<br>.31 NO3+0.72<br>HCHO+0.15 GLYC+1.34<br>NO2+0.35 HO2+0.34<br>HKET | 2.4D-12exp(360/T)   | (Lee et al., 2014)                         | Modified |
| ISOPNBO2+NO | 0.29 GLYC+0.29<br>HAC+0.71 HCHO+0.71<br>HO2+0.461<br>MACRN+0.249<br>MVKN+1.29 NO2                                               | 2.4D-12exp(360/T)   | (Lee et al., 2014)                         | Modified |
| MVK+HO      | MVKP                                                                                                                            | 2.60D-12exp(610/T)  | (Praske et al., 2015)                      | Modified |
| MVKP+NO     | 0.716 GLYC+0.716<br>ACO3+0.249<br>MGLY+0.249<br>HCHO+0.249 HO2+0.035<br>MVKN+0.965 NO2                                          | 2.7D-12exp(350/T)   | (Praske et al., 2015)                      | Modified |
| MVKP+HO2    | 0.38 VRP+0.37<br>GLYC+0.37 ACO3+0.62<br>HO+0.13 KET+0.25<br>HO2+0.12 MGLY+0.12<br>HCHO                                          | 1.82D-13exp(1300/T) | (Praske et al., 2015)                      | Modified |
| ISO+NO3     | INO2                                                                                                                            | 3.15D-12exp(-450/T) | MCM<br>v3.3.1                              | Modified |
| INO2+NO3    | 0.54 ICN+0.42 MVK+0.04<br>MACR+1.46 NO2+0.54<br>HO2+0.46 HCHO                                                                   | 2.30D-12            | (Schwantes et al., 2015)                   | Added    |
| INO2+INO2   | 0.39 INO+0.728 ICN+0.10<br>MACR+0.616<br>IHND+0.154 IHNB                                                                        | 5.2D-12             | (Schwantes et al., 2015)                   | Added    |
| INO{+O2}    | 0.88 ICN+0.88 HO2+0.12<br>NO2+0.12 HCHO+0.12                                                                                    | 2.5D-14exp(-300/T)  | (Schwantes et al., 2015)                   | Added    |

|               |                                                                                 |                     |                                                     |       |
|---------------|---------------------------------------------------------------------------------|---------------------|-----------------------------------------------------|-------|
|               | MACR                                                                            |                     |                                                     |       |
| ICN+NO3       | NH4CO3+HNO3                                                                     | 6.3D-12exp(-1860/T) | MCM v3.3.1                                          | Added |
| NH4CO3+NO     | PROPNN+CO+HO2+NO2                                                               | 7.5D-12exp(-690/T)  | MCM v3.3.1                                          | Added |
| NH4CO3+NH4CO3 | 0.3 R4N+0.7 PROPNN<br>+0.7 HO2+0.7 CO                                           | 1.0D-11             | MCM v3.3.1                                          | Added |
| ICN+HO        | 0.52 R4NO+ CO+0.52<br>HO2+0.48 R4N+0.48 HO                                      | 4.1D-11             | MCM v3.3.1<br>&<br>Schwantes(2015)                  | Added |
| IHND+HO       | 0.92 IDHNO2D+0.08<br>IEPOXD+0.08 NO2                                            | 1.1D-10             | (Schwantes et al., 2015)                            | Added |
| IHNB+HO       | IDHNO2B                                                                         | 4.2D-11             | (Schwantes et al., 2015)                            | Added |
| IDHNO2D+NO3   | HO2+NO2+0.12<br>HAC+0.12 ETHLN+0.8<br>GLYC+0.80<br>PROPNN+0.08 R4N+0.08<br>HCHO | 2.3D-12             | (Schwantes et al., 2015)                            | Added |
| IDHNO2B+NO3   | HO2+NO2+0.76<br>HAC+0.76 ETHLN+0.23<br>R4N+0.23 HCHO                            | 2.3D-12             | (Schwantes et al., 2015)                            | Added |
| INO2+HO2      | 0.22 MVK+0.015<br>MACR+0.235 NO2+0.235<br>HO+0.235 HCHO+0.54<br>INPD+0.23 INPB  | 2.06D-13exp(1300/T) | (Schwantes et al., 2015)                            | Added |
| INPD+HO       | HO2+INO2                                                                        | 6.9D-12             | (Schwantes et al., 2015;<br>St. Clair et al., 2015) | Added |
| INPB+HO       | HO2+INO2                                                                        | 6.9D-12             | (Schwantes et al., 2015;<br>St. Clair et al., 2015) | Added |
| INPD+HO       | 0.37 INHED+0.37<br>HO+0.63 INPHO2D                                              | 1.1D-10             | (Lee et al., 2014;<br>Schwantes et al., 2015)       | Added |
| INPB+HO       | 0.78 INHEB+0.78<br>HO+0.22 INPHO2B                                              | 4.2D-11             | (Lee et al., 2014;<br>Schwantes et al., 2015)       | Added |

|             |                                                                                                                           |                 |                                                  |          |
|-------------|---------------------------------------------------------------------------------------------------------------------------|-----------------|--------------------------------------------------|----------|
| INPHO2B+NO3 | NO2+HO2+HCHO+R4NO                                                                                                         | 2.3D-12         | (Schwantes et al., 2015)                         | Added    |
| INPHO2D+NO3 | NO2+HO2+0.92<br>PROPNN+0.92 GLY+0.08<br>HAC+0.08 ETHLN                                                                    | 2.3D-12         | (Schwantes et al., 2015)                         | Added    |
| INHED+HO    | 0.27 HAC+0.73 CO+0.27<br>NO2+0.27 HCHO+0.27<br>PROPNN+0.27 GLY+0.46<br>R4N                                                | 8.4D-12         | (Bates et al., 2016;<br>Schwantes et al., 2015)  | Added    |
| INHEB+HO    | 0.30 PROPNN+0.30<br>GLY+0.31 GLYC+0.31<br>MGLY+0.09 HAC+0.43<br>NO2+0.39 HCHO+0.01<br>ETHLN+0.01 HAC+0.12<br>KET+0.26 R4N | 1.25D-11        | (Bates et al., 2016;<br>Schwantes et al., 2015)  | Added    |
| R4N+HO      | PROPNN+HO2+CO                                                                                                             | 1.7D-11         | (Schwantes et al., 2015)                         | Added    |
| R4NO+HO     | PROPNN+HO+CO                                                                                                              | 1.7D-11         | (Schwantes et al., 2015)                         | Added    |
| INPD+hv     | INO+HO                                                                                                                    | j(Pj_ch3o2h)    | MCM<br>v3.3.1<br>Schwantes et al. (2015)         | Added    |
| INPB+hv     | INO+HO                                                                                                                    | j(Pj_ch3o2h)    | MCM<br>v3.3.1<br>Schwantes et al. (2015)         | Added    |
| ICN+hv      | PROPNN+CO+CO+HO2+<br>HO2                                                                                                  | 10*j(Pj_noa)    | (Müller et al., 2014;<br>Schwantes et al., 2015) | Added    |
| R4N+hv      | NO2+ACO3+0.5<br>ETHP+0.5 MO2                                                                                              | j(Pj_ch3coc2h5) | MCM<br>v3.3.1<br>Schwantes et al. (2015)         | Added    |
| R4NO+hv     | HO+MGLY+HCHO+NO2                                                                                                          | j(Pj_ch3coc2h5) | MCM<br>v3.3.1<br>Schwantes et al. (2015)         | Added    |
| IHND+hv     | HO2+NO2+UHC+DIBOO                                                                                                         | j(Pj_onit1)     | Same as<br>ISOPND                                | Added    |
| IHNB+hv     | HO2+NO2+UHC+DIBOO                                                                                                         | j(Pj_onitOH3)   | Same as<br>ISOPNB                                | Added    |
| PROPNN+hv   | NO2+ACO3+HCHO                                                                                                             | 10*j(Pj_noa)    | Müller et al.<br>(2014)                          | Modified |

|            |                       |                     |                       |          |
|------------|-----------------------|---------------------|-----------------------|----------|
| ETHLN+hv   | HO2+CO+HCHO+NO2       | 10*j(Pj_noa)        | (Müller et al., 2014) | Modified |
| MACRN+hv   | NO2+CO+HAC+HO2        | 10*j(Pj_ibutald)    | (Müller et al., 2014) | Modified |
| MVKN+hv    | GLYC+NO2+ACO3         | 10*j(Pj_noa)        | (Müller et al., 2014) | Modified |
| API+NO3    | 0.10 TOLNN+0.90 TOLND | 8.33D-13exp(490/T)  | MCM v3.3.1            | Modified |
| UTONIT+NO3 | HONIT                 | 3.15D-13exp(-448/T) | (Fisher et al., 2016) | Added    |
| UTONIN+NO3 | HONIT                 | 3.15D-13exp(-448/T) | (Fisher et al., 2016) | Added    |
| TONIN+NO3  | HONIT                 | 3.15D-13exp(-448/T) | (Fisher et al., 2016) | Added    |
| TONIT+NO3  | HONIT                 | 3.15D-13exp(-448/T) | (Fisher et al., 2016) | Added    |
| TONIH+NO3  | HONIT                 | 3.15D-13exp(-448/T) | (Fisher et al., 2016) | Added    |

**Table S1: Isoprene and Monoterpene reactions added to/revised from RACM2\_Berkeley.**

| Species | Description                                           | Species | Description                                                            |
|---------|-------------------------------------------------------|---------|------------------------------------------------------------------------|
| ISHPA   | (1,2) hydroxy hydro peroxides                         | INO2    | Isoprene nitrooxy peroxy radical                                       |
| ISHPB   | (4,3) hydroxy hydro peroxides                         | ICN     | C5 carbonyl nitrate                                                    |
| ISHPD   | delta (1,4 and 4,1) hydroxy hydro peroxides           | INO     | C5 nitrooxyalkoxy radical                                              |
| IEPOXA  | trans- $\beta$ isoprene-derived dihydroxy epoxide     | IHND    | C5 hydroxy nitrate – $\beta$ isomer                                    |
| IEPOXB  | cis- $\beta$ isoprene-derived dihydroxy epoxide       | IHNB    | C5 hydroxy nitrate – $\delta$ isomer                                   |
| IEPOXD  | delta isoprene-derived dihydroxy epoxide              | NH4CO3  | Radical from ICN                                                       |
| R4N     | C4 carbonyl hydroxynitrate                            | INPB    | C5 nitrooxy hydroperoxide – $\beta$ isome                              |
| R4NO    | C4 nitrooxycarbonyl hydroperoxide                     | INPHO2B | C5 nitrooxy hydroperoxy hydroxy peroxy radical (From $\beta$ isomers)  |
| IDHNO2D | C5 dihydroxy nitrooxyperoxy radical – $\delta$ isomer | INPHO2D | C5 nitrooxy hydroperoxy hydroxy peroxy radical (From $\delta$ isomers) |
| IDHNO2B | C5 dihydroxy nitrooxyperoxy radical– $\beta$ isomer   | INHED   | C5 nitrooxy hydroxy epoxide – $\delta$ isomer                          |
| INPD    | C5 nitrooxy hydroperoxide – $\delta$ isomer           | INHEB   | C5 nitrooxy hydroxy epoxide – $\beta$ isomer                           |

Table S2: New chemical species that are introduced in RACM2\_Berkeley2 mechanism.

| Species                                                                                                                                     | H* (M atm <sup>-1</sup> ) | f0 |
|---------------------------------------------------------------------------------------------------------------------------------------------|---------------------------|----|
| ISOPND,<br>ISOPNB,<br>IMONIT,<br>MACRN,<br>MVKN, INPD,<br>INPB, ICN, R4N,<br>R4NO, IHND,<br>IHNB, TONIT,<br>UTONIT, TONIN,<br>UTONIN, TONIH | 2.00E+06                  | 1  |
| PROPNN                                                                                                                                      | 5.0E+5                    | 1  |
| ISHPA, ISHPB,<br>ISHPD                                                                                                                      | 1.0E+14                   | 0  |
| IEPOXA,<br>IEPOXB,<br>IEPOXD, INHEB,<br>INHED                                                                                               | 8.0E+7                    | 1  |
| GLYC                                                                                                                                        | 2.00E+7                   | 1  |
| HAC                                                                                                                                         | 1.4E+6                    | 1  |
| H2O2                                                                                                                                        | 5.0E+7                    | 1  |

**Table S3: Changes to dry deposition parameters for isoprene chemistry species and organic nitrate species as recommended by Nguyen et al. (2015). H\* is the Henry's law coefficient and f0 is the reactivity factor as defined in Wesely (1989).**

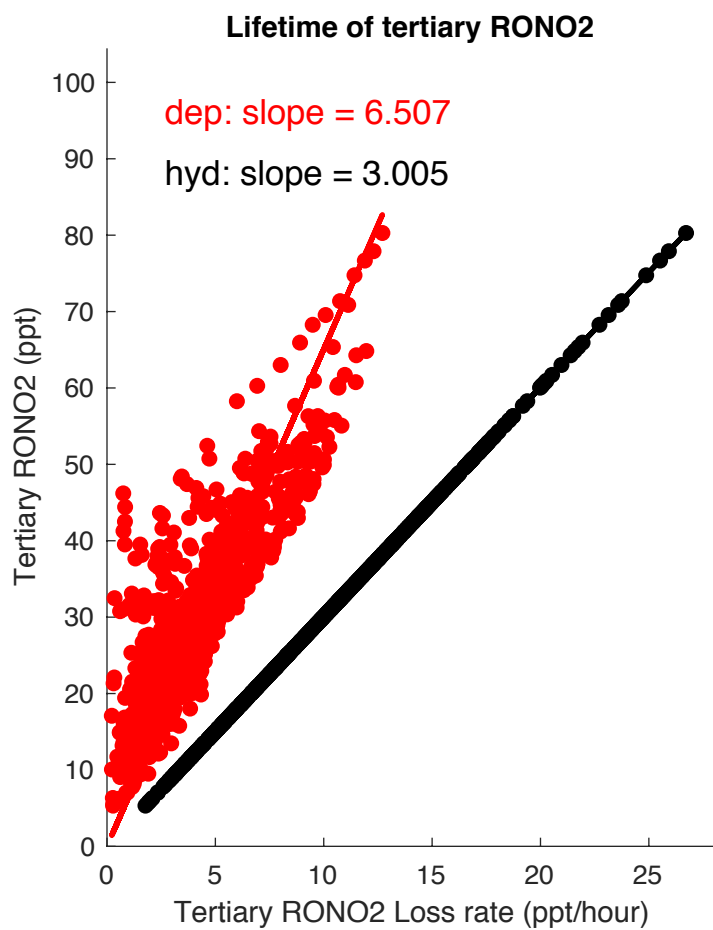

**Figure S1: The concentration of tertiary organic nitrates versus their loss rates through deposition and hydrolysis during SOAS. Slopes of the linear fit give the lifetimes against deposition and hydrolysis of tertiary organic nitrates.**



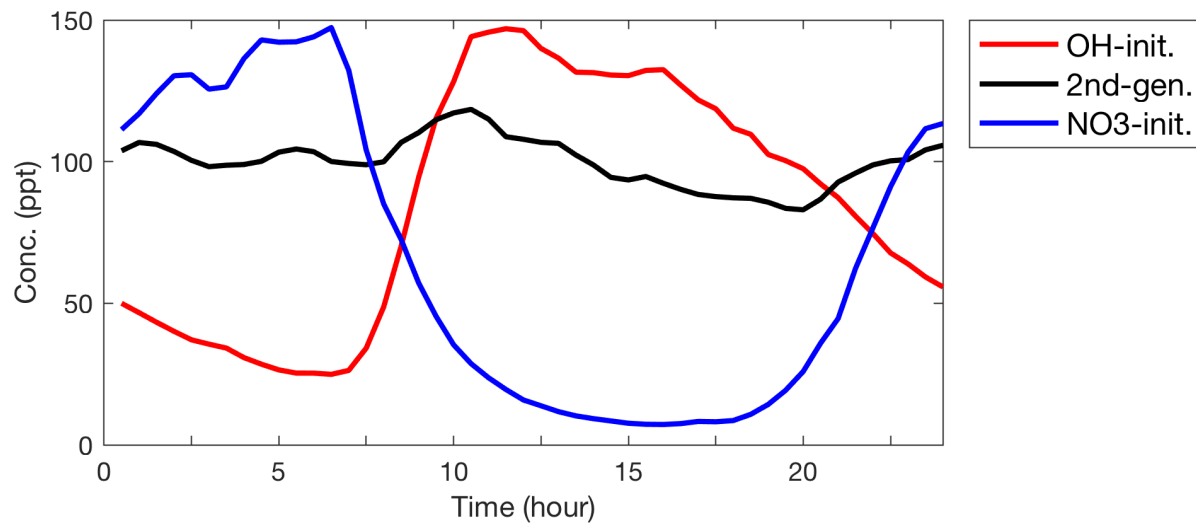

**Figure S2: Diurnal cycle of the OH-initiated, NO<sub>3</sub>-initiated and second-generation organic nitrate concentrations simulated by WRF-Chem using RACM2\_Berkeley2 at the CTR site during SOAS.**

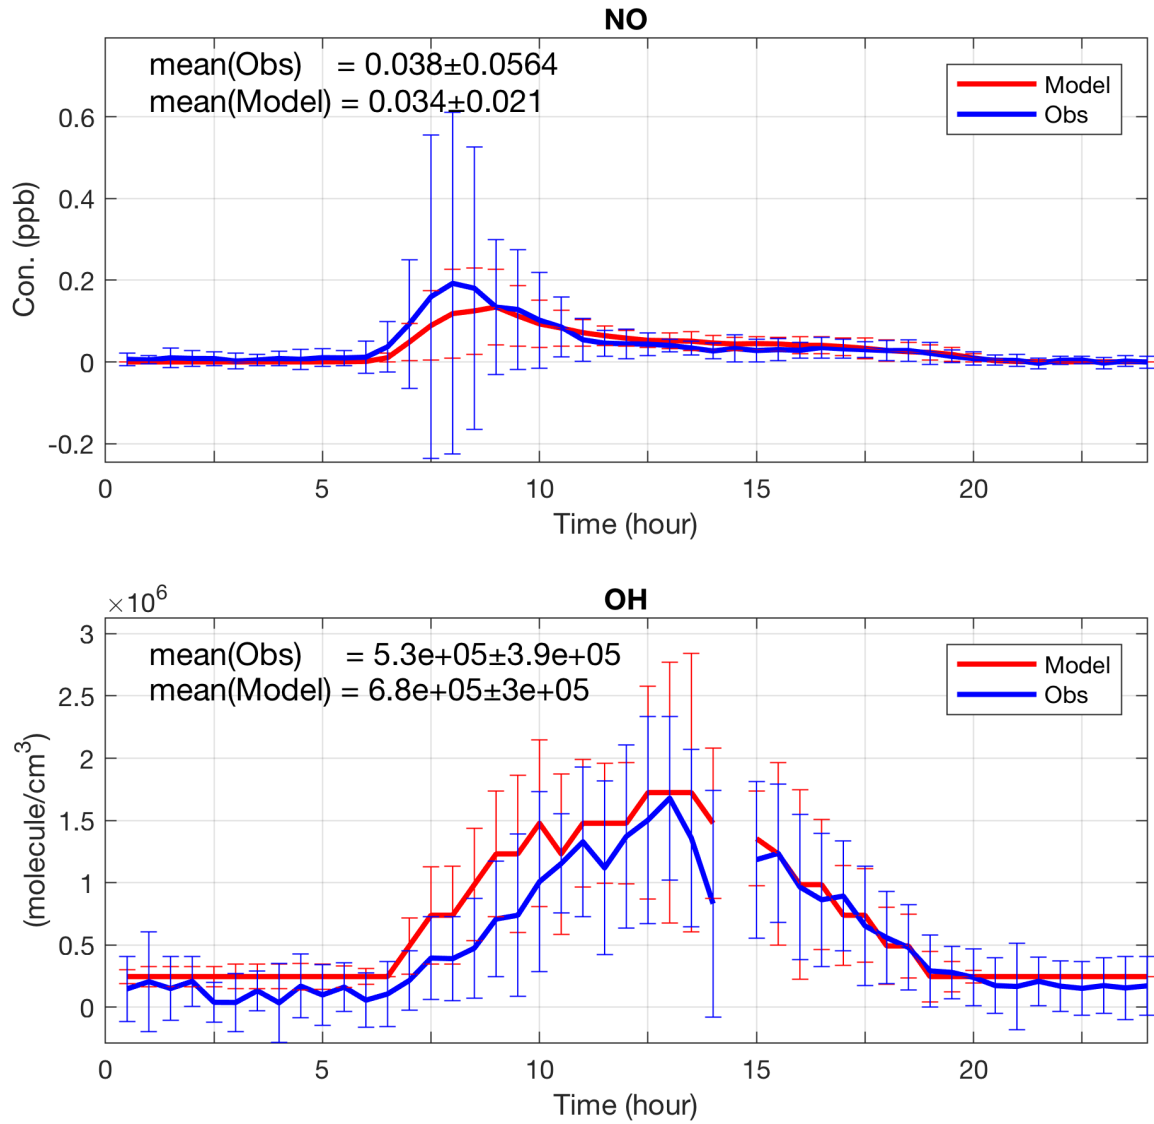

Figure S3: Median diurnal cycles of observed and simulated NO and OH concentrations at Centreville (CTR) during the 2013 SOAS campaign. The vertical bars show the interquartile range of the hourly data. The panel includes mean of the simulated and observed concentrations.

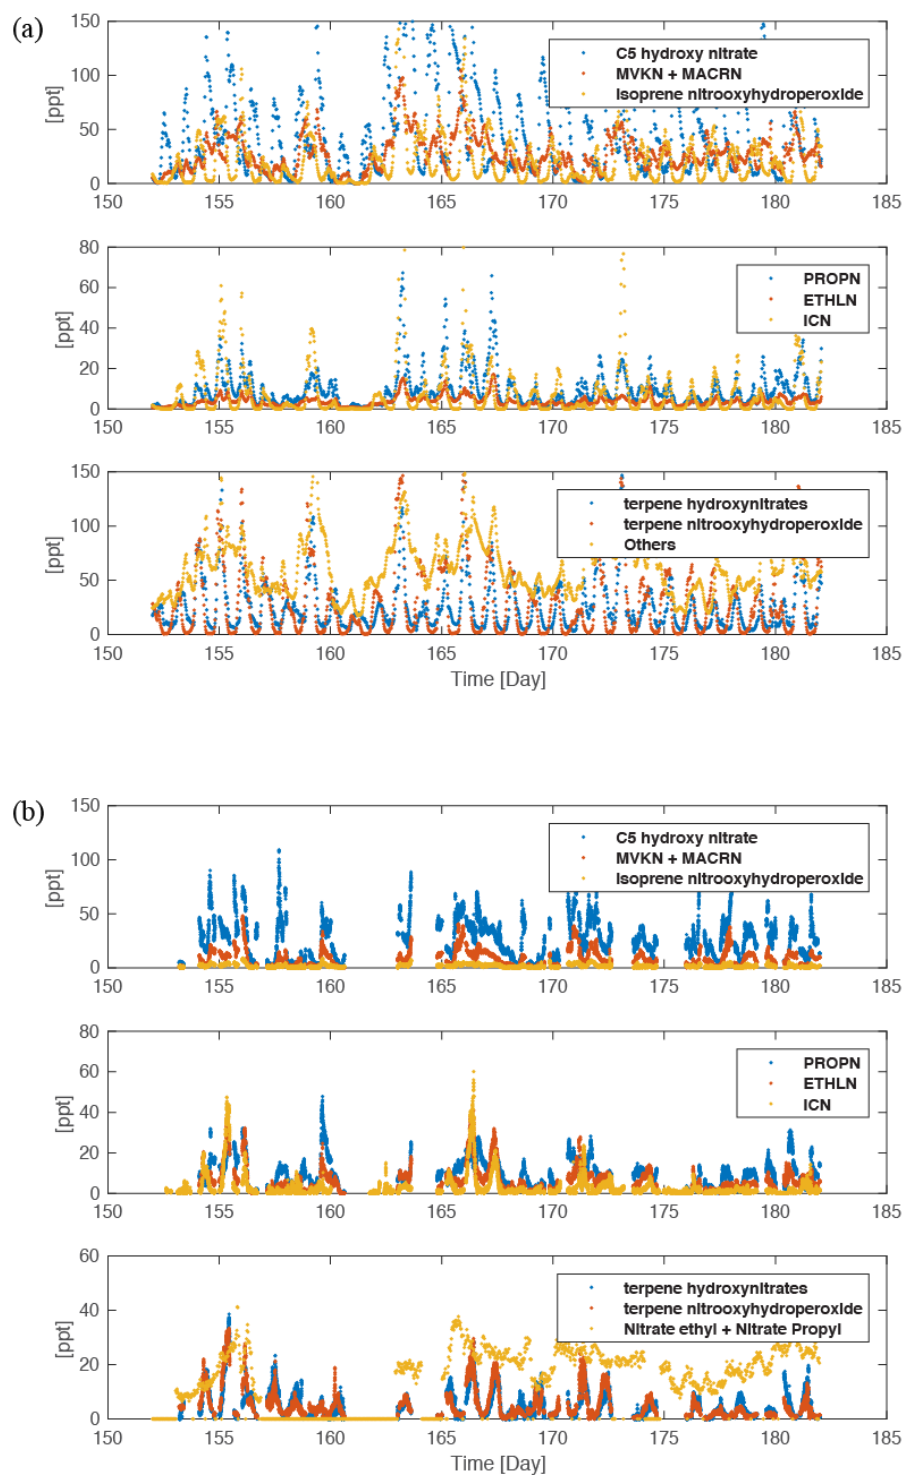

**Figure S4:** The (a) simulated and (b) observed concentration of C5 hydroxy nitrate, MVKN+MACRN, C5 nitrooxy hydroperoxide [first panel], Propanone nitrate (PROPNN), Ethanal nitrate (ETHLN), C5 carbonyl nitrate (ICN) [second panel], and terpene hydroxynitrates, terpene nitrooxy hydroperoxide, and anthropogenic organic nitrates (Others) [3rd panel] in June 2013 during the SOAS field campaign. At the figure (b) on 3rd panel, observed ethyl Nitrate + propyl Nitrate is shown.

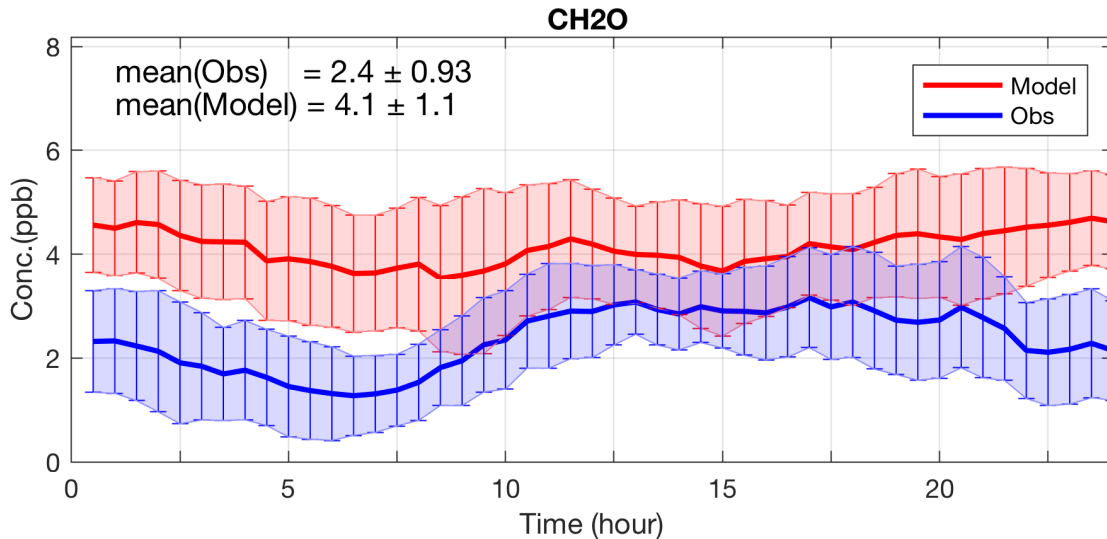

Figure S5: Median diurnal cycles of observed and simulated CH<sub>2</sub>O at Centreville during the 2013 SOAS campaign. The vertical bars show the interquartile range of the hourly data. The panel includes mean of the simulated and observed values.

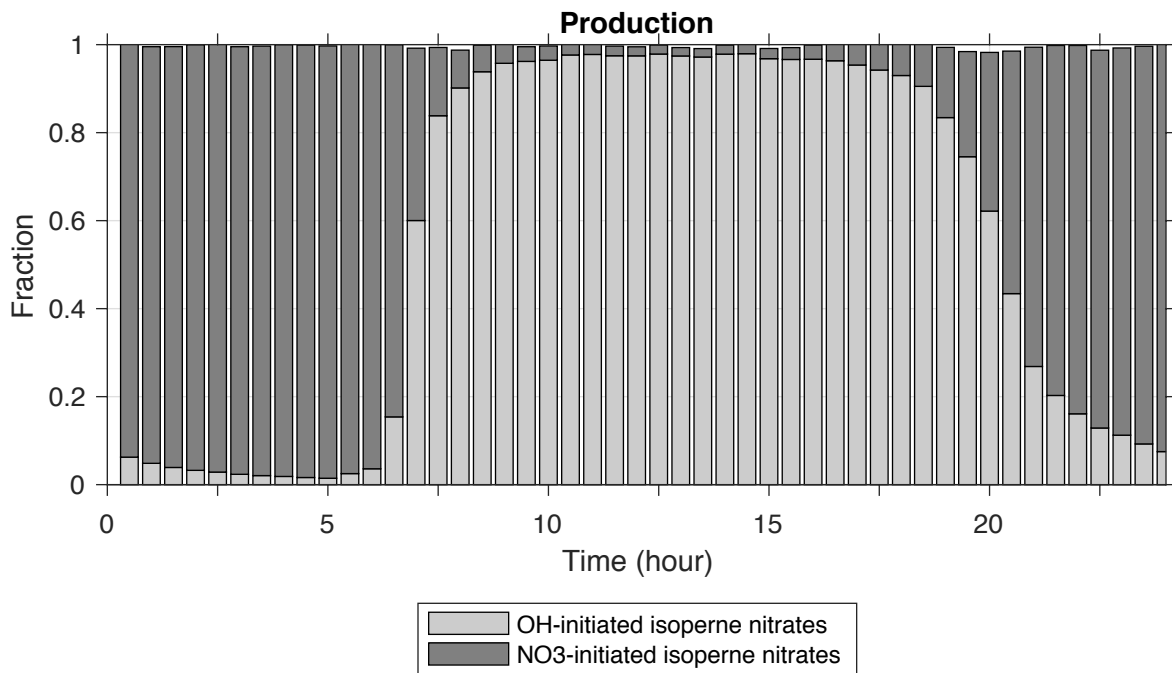

Figure S6: Fraction of isoprene nitrates from OH and NO<sub>3</sub> oxidations to total isoprene nitrate production at boundary layer at the CTR site during SOAS.

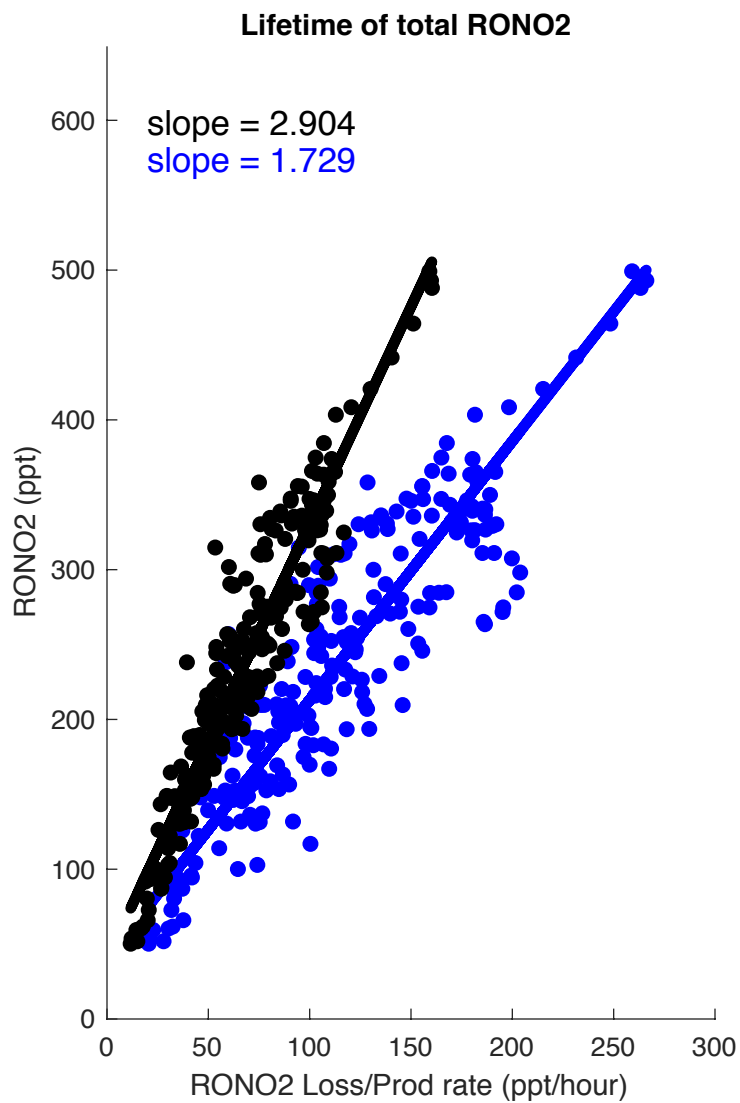

Figure S7: The concentrations of organic nitrates versus their loss rates (black) and production rates (blue) at 12:00-16:00 during SOAS. Slopes of the linear fit give lifetime of organic nitrates.

## References

- Bates, K. H., Nguyen, T. B., Teng, A. P., Crounse, J. D., Kjaergaard, H. G., Stoltz, B. M., Seinfeld, J. H. and Wennberg, P. O.: Production and Fate of C<sub>4</sub> Dihydroxycarbonyl Compounds from Isoprene Oxidation, *J. Phys. Chem. A*, 120(1), 106–117, doi:10.1021/acs.jpca.5b10335, 2016.
- Fisher, J. A., Jacob, D. J., Travis, K. R., Kim, P. S., Marais, E. A., Chan Miller, C., Yu, K., Zhu, L., Yantosca, R. M., Sulprizio, M. P., Mao, J., Wennberg, P. O., Crounse, J. D., Teng, A. P., Nguyen, T. B., St. Clair, J. M., Cohen, R. C., Romer, P., Nault, B. A., Wooldridge, P. J., Jimenez, J. L., Campuzano-Jost, P., Day, D. A., Hu, W., Shepson, P. B., Xiong, F., Blake, D. R., Goldstein, A. H., Misztal, P. K., Hanisco, T. F., Wolfe, G. M., Ryerson, T. B., Wisthaler, A. and Mikoviny, T.: Organic nitrate chemistry and its implications for nitrogen budgets in an isoprene- and monoterpene-rich atmosphere: constraints from aircraft (SEAC4RS) and ground-based (SOAS) observations in the Southeast US, *Atmos Chem Phys*, 16(9), 5969–5991, doi:10.5194/acp-16-5969-2016, 2016.
- Jacobs, M. I., Burke, W. J. and Elrod, M. J.: Kinetics of the reactions of isoprene-derived hydroxynitrates: gas phase epoxide formation and solution phase hydrolysis, *Atmos Chem Phys*, 14(17), 8933–8946, doi:10.5194/acp-14-8933-2014, 2014.
- Lee, L., Teng, A. P., Wennberg, P. O., Crounse, J. D. and Cohen, R. C.: On Rates and Mechanisms of OH and O<sub>3</sub> Reactions with Isoprene-Derived Hydroxy Nitrates, *J. Phys. Chem. A*, 118(9), 1622–1637, doi:10.1021/jp4107603, 2014.
- Liu, Y. J., Herdinger-Blatt, I., McKinney, K. A. and Martin, S. T.: Production of methyl vinyl ketone and methacrolein via the hydroperoxyl pathway of isoprene oxidation, *Atmos Chem Phys*, 13(11), 5715–5730, doi:10.5194/acp-13-5715-2013, 2013.
- Müller, J.-F., Peeters, J. and Stavrou, T.: Fast photolysis of carbonyl nitrates from isoprene, *Atmos Chem Phys*, 14(5), 2497–2508, doi:10.5194/acp-14-2497-2014, 2014.
- Nguyen, T. B., Crounse, J. D., Teng, A. P., Clair, J. M. S., Paulot, F., Wolfe, G. M. and Wennberg, P. O.: Rapid deposition of oxidized biogenic compounds to a temperate forest, *Proc. Natl. Acad. Sci.*, 112(5), E392–E401, doi:10.1073/pnas.1418702112, 2015.
- Peeters, J., Müller, J.-F., Stavrou, T. and Nguyen, V. S.: Hydroxyl Radical Recycling in Isoprene Oxidation Driven by Hydrogen Bonding and Hydrogen Tunneling: The Upgraded LIM1 Mechanism, *J. Phys. Chem. A*, 118(38), 8625–8643, doi:10.1021/jp5033146, 2014.
- Praske, E., Crounse, J. D., Bates, K. H., Kurtén, T., Kjaergaard, H. G. and Wennberg, P. O.: Atmospheric Fate of Methyl Vinyl Ketone: Peroxy Radical Reactions with NO and HO<sub>2</sub>, *J. Phys. Chem. A*, 119(19), 4562–4572, doi:10.1021/jp5107058, 2015.
- Schwantes, R. H., Teng, A. P., Nguyen, T. B., Coggon, M. M., Crounse, J. D., St. Clair, J. M., Zhang, X., Schilling, K. A., Seinfeld, J. H. and Wennberg, P. O.: Isoprene NO<sub>3</sub> Oxidation Products from the RO<sub>2</sub> + HO<sub>2</sub> Pathway, *J. Phys. Chem. A*, doi:10.1021/acs.jpca.5b06355, 2015.
- St. Clair, J. M., Rivera-Rios, J. C., Crounse, J. D., Knap, H. C., Bates, K. H., Teng, A. P., Jørgensen, S., Kjaergaard, H. G., Keutsch, F. N. and Wennberg, P. O.: Kinetics and Products of the Reaction of the First-Generation Isoprene Hydroxy Hydroperoxide (ISOPOOH) with OH, *J. Phys. Chem. A*, doi:10.1021/acs.jpca.5b06532, 2015.
- Teng, A. P., Crounse, J. D. and Wennberg, P. O.: Isoprene Peroxy Radical Dynamics, *J. Am. Chem. Soc.*, 139(15), 5367–5377, doi:10.1021/jacs.6b12838, 2017.

Wesely, M. L.: Parameterization of surface resistances to gaseous dry deposition in regional-scale numerical models, *Atmospheric Environ.* 1967, 23(6), 1293–1304, doi:10.1016/0004-6981(89)90153-4, 1989.
